# Supplementary material
Source: Springer Nature journal article supplement (https://www.springermedizin.de/resource/supplementary/13006_2009_98_MOESM2_ESM.pdf/9628006)
Supplement: MOESM2 [file 9628006]

# 1. Program contents and procedure

Intervention timing: Early postpartum to day 4-5

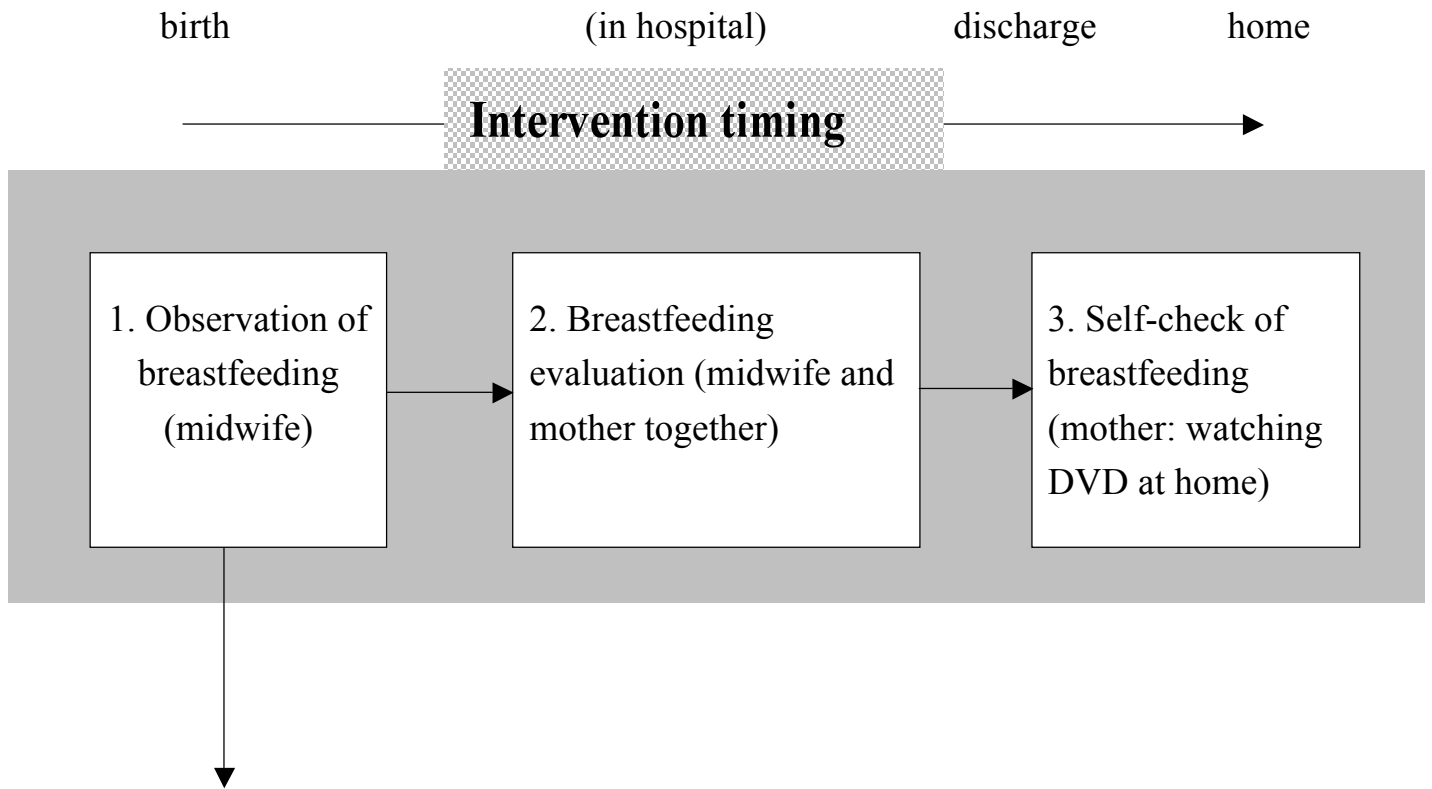

## 2. Observation items and points

| items                              | points                                                                                                                                                                                                            |
|------------------------------------|-------------------------------------------------------------------------------------------------------------------------------------------------------------------------------------------------------------------|
| Positioning                        | Mother's posture, position and attitude of mother holding baby, state when baby attaches, appearance of infant's body attached to mother, method of supporting breast, etc.                                       |
| Latch-on                           | Infant's head and latching on to breast when suckling, position of mouth and tongue when suckling, curling of tongue when suckling<br>Rhythm of suckling, desire to breastfeed, signs of effective suckling, etc. |
| Breast and nipple                  | Painful nipple/breast, whether injury to areola/nipple, appearance of engorged breasts, whether breast blockage or rash, etc.                                                                                     |
| Mother's confidence and motivation | Confirmation of feeding cues, practicing independent breastfeeding, desire to breastfeed, methods for continuing support                                                                                          |
